# Supplementary material for: Physical activity and exercise for older people living with HIV: a protocol for a scoping review
Source: Springer Nature journal article supplement (doi:10.1186/s13643-020-01327-4), 2020-03-20
Supplement: MOESM2 [file 17819666]

## DRAFT SEARCH STRATEGY

| Keywords Searched                                                                                                                                                                                                                                                                                                                                                                                                                                                                                                                                                                                                                                    | Data Base |
|------------------------------------------------------------------------------------------------------------------------------------------------------------------------------------------------------------------------------------------------------------------------------------------------------------------------------------------------------------------------------------------------------------------------------------------------------------------------------------------------------------------------------------------------------------------------------------------------------------------------------------------------------|-----------|
| ("anthropometric" OR "quality of life" OR "BMI" OR "Body Mass Index" OR "WHR" OR "Waist hip ratio" OR "skin fold" OR "functional status" OR "function" OR "ADL*" OR "activity* of daily living" OR "heart rate" OR "blood pressure") AND (("physical activity" OR "exercise" OR "exercise rehabilitation" OR "Exercise intervention" OR "aerobic exercise" OR "Anaerobic exercise" OR "combination exercise" OR "strength exercise" OR "flexibility" OR "agility") AND (("geriatrics" OR "aged" OR "older" OR "ageing" OR "senescence" OR "old") AND ("HIV" OR "Human immunodeficiency virus" OR "AIDS" OR "acquired immune deficiency syndrome")))) | PubMed    |
