# Supplementary material for: Physical activity and exercise for older people living with HIV: a protocol for a scoping review
Source: Springer Nature journal article supplement (doi:10.1186/s13643-020-01327-4), 2020-03-20
Supplement: MOESM3 [file 17819666]

## DATA CHARTING FORM

---

Title of Study:

---

Author(s)

Year of Publication

Country of Origin (where the study was conducted)

Aim/Objective of Study

Study Setting

Study Population

Participants Characteristics (Gender, CD4 Count, %  
on ARV, % Undetectable, % Adherent)

Sampling (method and size)

Study Design

Physical activity (type or duration or intensity)

Data Analysis

Conclusion

Outcomes (findings relevant to study objectives)

Key Relevant Findings

Conclusion

---
